# Supplementary material for: Regulating charge carrier extraction and transport with dual-interface modification for efficient perovskite solar cells
Source: Royal Society of Chemistry journal article supplement (doi:10.1039/d3tc01289a), 2023-01-01
Supplement: d3tc01289a1.pdf [file d3tc01289a1.pdf]

## Supporting Information

### **Regulating Charge Carrier Extraction and Transport with Dual- interface Modification for Efficient Perovskite Solar Cells**

Weitao Ye <sup>a</sup>, Zhentao Du <sup>a,\*</sup>, Deliu Ou <sup>a</sup>, Jielei Tu <sup>c</sup>, Minghui Shang <sup>b</sup>, Jiahui Zhou <sup>b</sup>, Lin Wang <sup>b</sup>,  
Weiyu Yang <sup>b</sup>, Zuobao Yang <sup>b,c,\*</sup>

<sup>a</sup> School of Resources, Environment and Materials, State Key Laboratory of Featured Metal Materials and Life-cycle Safety for Composite Structures, Guangxi University, Nanning, 530004, P. R. China

<sup>b</sup> Institute of Micro/Nano Materials and Devices, Ningbo University of Technology, Ningbo, 315211, P. R. China

<sup>c</sup> Yunnan Provincial Rural Energy Engineering Key Laboratory, Yunnan Normal University, Kunming, 650500, P. R. China

\* Corresponding Authors: Zhentao Du, Email: [zhentaodu@126.com](mailto:zhentaodu@126.com); Zuobao Yang, Email: [hokepoly@nbut.edu.cn](mailto:hokepoly@nbut.edu.cn);

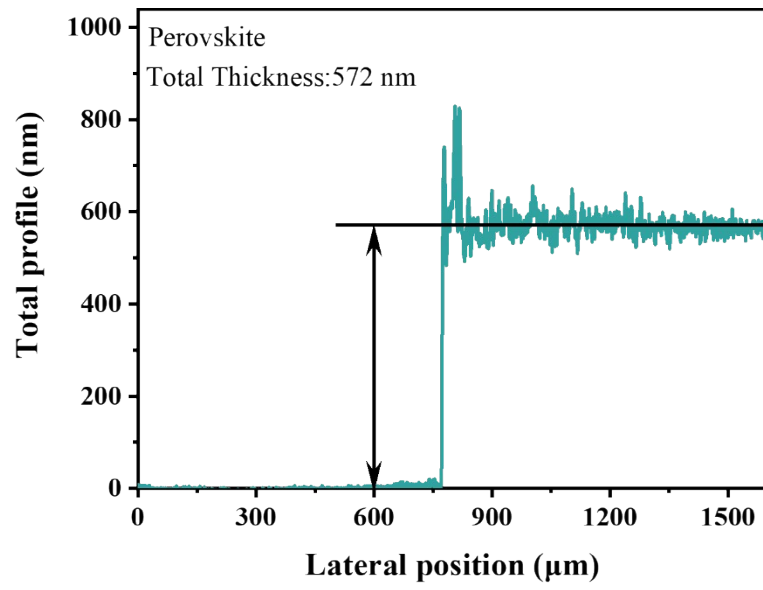

**Figure S1.** The thickness of the perovskite films.

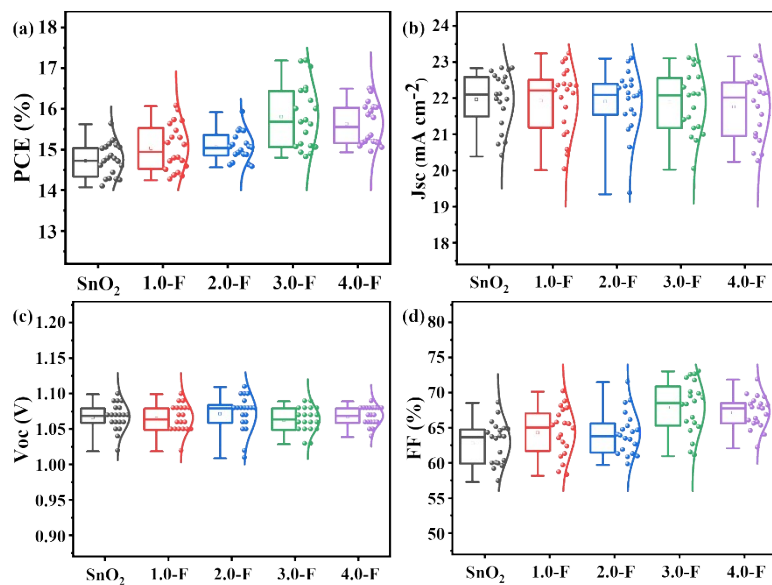

**Figure S2.** The photovoltaic parameters distribution: (a) PCE, (b) Jsc, (c) Voc and (d) FF of the perovskite solar cells without or with ETL/perovskite interface modification with different NH<sub>4</sub>F concentration varying from 1.0 to 4.0 mg mL<sup>-1</sup>.

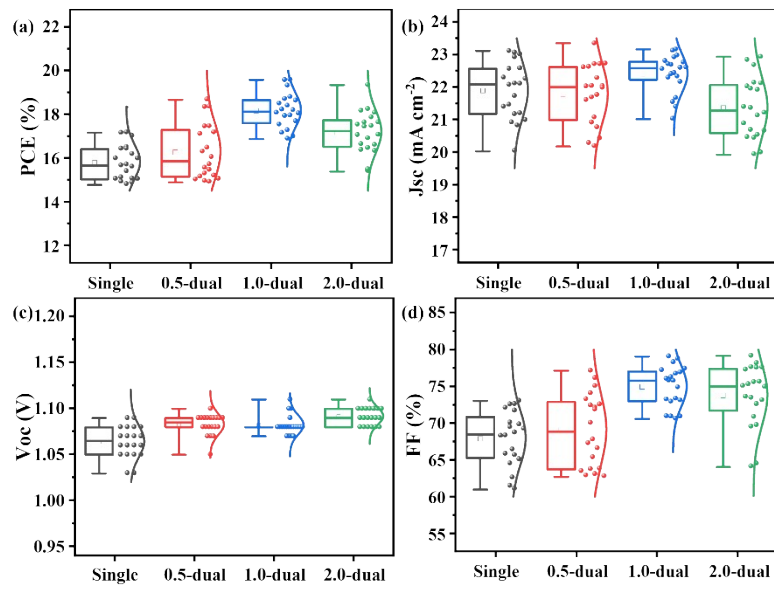

**Figure S3.** The photovoltaic parameters distribution: (a) PCE, (b) Jsc, (c) Voc and (d) FF of the perovskite solar cells with optimized single interface modification or with dual-interface modification with different GABr concentration varying from 0.5 to 2.0 mg mL<sup>-1</sup>.

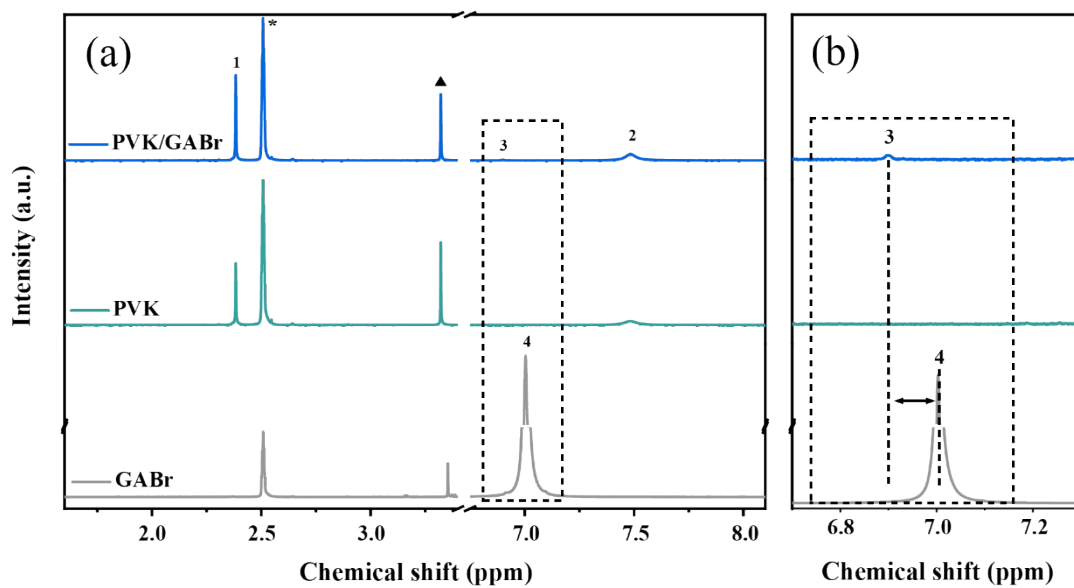

**Figure S4.** (a)  $^1\text{H}$  NMR spectra of pure GABr, PVK and PVK/GABr in  $\text{DMSO-}d_6$  solution, (b) Magnified NMR spectra for marked area with dashed square in Figure S4a. The star and triangle symbols denote the peaks from the solvent and water.

**Table S1** Extracted parameters from TRPL Spectra in **Figure 4b**.

|         | $\tau_1$ (ns) | $A_1$ (%) | $\tau_2$ (ns) | $A_2$ (%) |
|---------|---------------|-----------|---------------|-----------|
| Control | 8.01          | 60.82     | 166.34        | 39.18     |
| OSIM    | 5.63          | 70.15     | 180.51        | 29.85     |
| Target  | 3.76          | 73.18     | 187.58        | 26.82     |
